# Supplementary material
Source: PubMed Central journal article supplement (PMC4672631)
Supplement: NIHMS737391-supplement-SM.pdf [file NIHMS737391-supplement-SM.pdf]

## SUPPLEMENTARY INFORMATION

**Table S1.** Primers used for introduction of 6-Histidine affinity purification tag at the 3'-end of *petA* in *F. diplosiphon* SF33 (restriction sites are underlined, 6-Histidine tag is marked in bold, italicized letters).

| Primer          | Sequence (5' to 3')                                                                                                                                                                       |
|-----------------|-------------------------------------------------------------------------------------------------------------------------------------------------------------------------------------------|
| petA-F-NcoI     | GCT <u>CCATGGG</u> CCTTGCTCAACATACTTCCACATG                                                                                                                                               |
| petA-His-R3     | <b><i>GTGATGGT</i></b> <b><i>GATGGT</i></b> <b><i>GATGG</i></b> <b><i>AAATTC</i></b> <b><i>ATTTCT</i></b> <b><i>GCGG</i></b> <b><i>CCTTGG</i></b> <b><i>ACTTTCTC</i></b><br>AACCTGCTTCTT  |
| petA-R-EcoRI    | GCG <u>GAATTC</u> CCTACAAGGAAGAGACAAGCGTAT                                                                                                                                                |
| petA-His-F3     | <b><i>CATCACC</i></b> <b><i>ATCACC</i></b> <b><i>ATCACT</i></b> <b><i>AAATTC</i></b> <b><i>TTTGCT</i></b> <b><i>AACTTACTT</i></b> <b><i>TATTTAA</i></b> <b><i>AAGAC</i></b><br>AGGCAATTTG |
| petAseq2        | ACTTCCACTTCTGTCTGGCTTTGCA                                                                                                                                                                 |
| pJCF276seq2NcoI | ACAGACGGGCATGATGAACCTGAAT                                                                                                                                                                 |
| pJCF276seqEcoRI | TGTACCTATAACCAGACCGTTCAGC                                                                                                                                                                 |

**Table S2.** Inter-monomer Interactions in the Cyt *b<sub>6</sub>f* Complex (PDB ID 4OGQ). Abbreviations, res1, res2, residues 1 and 2; Ch.1, Ch.2, Chains 1 and 2; aaProperty, amino acid property (phil, hydrophilic; phob, hydrophobic); #, amino acid number.

| <b>Monomer1</b> |          |              |             | <b>Monomer2</b> |          |              |             | <b>aaProperty</b> |              |              |
|-----------------|----------|--------------|-------------|-----------------|----------|--------------|-------------|-------------------|--------------|--------------|
| <b>Res1</b>     | <b>#</b> | <b>Atom1</b> | <b>Ch.1</b> | <b>Res2</b>     | <b>#</b> | <b>Atom2</b> | <b>Ch.2</b> | <b>Dist(Å)</b>    | <b>Prop1</b> | <b>Prop2</b> |
| TRP             | 7        | CZ3          | A           | LEU             | 116      | CG           | A           | 3.86              | phil         | phob         |
| TRP             | 7        | CZ2          | A           | GLU             | 115      | CD           | A           | 3.92              | phil         | phil         |
| PHE             | 8        | CE1          | A           | LEU             | 116      | CD1          | A           | 3.96              | phob         | phob         |
| GLU             | 10       | OE2          | A           | LYS             | 112      | NZ           | A           | 3.58              | phil         | phil         |
| ARG             | 11       | NE           | A           | GLU             | 115      | OE2          | A           | 2.72              | phil         | phil         |
| ARG             | 11       | CG           | A           | PRO             | 113      | O            | A           | 3.70              | phil         | phob         |
| ARG             | 11       | NH2          | A           | LYS             | 112      | CG           | A           | 3.56              | phil         | phil         |
| ARG             | 11       | O            | A           | LYS             | 208      | CE           | A           | 3.54              | phil         | phil         |
| LEU             | 12       | CD2          | A           | MET             | 205      | CE           | A           | 3.74              | phob         | phob         |
| LEU             | 12       | CD2          | A           | LEU             | 116      | CD1          | A           | 3.72              | phob         | phob         |
| LEU             | 12       | CD2          | A           | PHE             | 201      | CZ           | A           | 3.99              | phob         | phob         |
| LEU             | 12       | O            | A           | LYS             | 208      | CE           | A           | 3.82              | phob         | phil         |
| GLU             | 13       | OE2          | A           | LYS             | 208      | NZ           | A           | 2.95              | phil         | phil         |
| PHE             | 48       | CZ           | A           | PHE             | 189      | CZ           | A           | 3.66              | phob         | phob         |
| PHE             | 48       | CE2          | A           | TRP             | 193      | CE2          | A           | 3.86              | phob         | phil         |
| PHE             | 52       | CB           | A           | PHE             | 189      | CE2          | A           | 3.58              | phob         | phob         |
| PHE             | 52       | CE1          | A           | VAL             | 190      | CG2          | A           | 3.36              | phob         | phob         |
| THR             | 55       | OG1          | A           | SER             | 185      | OG           | A           | 2.61              | phil         | phil         |
| THR             | 55       | O            | A           | THR             | 181      | CG2          | A           | 3.42              | phil         | phil         |
| PHE             | 56       | O            | A           | THR             | 181      | CG2          | A           | 3.41              | phob         | phil         |
| PHE             | 56       | CE1          | A           | SER             | 185      | OG           | A           | 3.34              | phob         | phil         |
| PHE             | 56       | CD2          | A           | ARG             | 182      | NE           | A           | 3.55              | phob         | phil         |
| TYR             | 57       | N            | A           | THR             | 181      | CG2          | A           | 3.88              | phil         | phil         |
| TYR             | 57       | OH           | A           | ARG             | 182      | NH2          | A           | 2.93              | phil         | phil         |
| LYS             | 59       | CE           | A           | GLN             | 177      | CG           | A           | 3.50              | phil         | phil         |
| LYS             | 59       | CE           | A           | THR             | 181      | OG1          | A           | 3.92              | phil         | phil         |
| PRO             | 60       | CG           | A           | PRO             | 60       | CG           | A           | 3.77              | phob         | phob         |
| THR             | 61       | OG1          | A           | THR             | 61       | OG1          | A           | 3.16              | phil         | phil         |
| LYS             | 112      | CG           | A           | ARG             | 11       | NH2          | A           | 3.56              | phil         | phil         |
| LYS             | 112      | NZ           | A           | GLU             | 10       | OE2          | A           | 3.58              | phil         | phil         |
| PRO             | 113      | O            | A           | ARG             | 11       | CG           | A           | 3.70              | phob         | phil         |
| GLU             | 115      | OE2          | A           | ARG             | 11       | NE           | A           | 2.72              | phil         | phil         |
| GLU             | 115      | CD           | A           | TRP             | 7        | CZ2          | A           | 3.92              | phil         | phil         |
| LEU             | 116      | CD1          | A           | LEU             | 12       | CD2          | A           | 3.72              | phob         | phob         |
| LEU             | 116      | CG           | A           | TRP             | 7        | CZ3          | A           | 3.86              | phob         | phil         |
| LEU             | 116      | CD1          | A           | PHE             | 8        | CE1          | A           | 3.96              | phob         | phob         |
| GLN             | 177      | CG           | A           | LYS             | 59       | CE           | A           | 3.50              | phil         | phil         |
| THR             | 181      | OG1          | A           | LYS             | 59       | CE           | A           | 3.91              | phil         | phil         |
| THR             | 181      | CG2          | A           | THR             | 55       | O            | A           | 3.42              | phil         | phil         |
| THR             | 181      | CG2          | A           | PHE             | 56       | O            | A           | 3.41              | phil         | phob         |
| THR             | 181      | CG2          | A           | TYR             | 57       | N            | A           | 3.88              | phil         | phil         |
| ARG             | 182      | NH2          | A           | TYR             | 57       | OH           | A           | 2.93              | phil         | phil         |
| ARG             | 182      | NE           | A           | PHE             | 56       | CD2          | A           | 3.55              | phil         | phob         |

|     |     |     |   |     |     |     |   |      |      |      |
|-----|-----|-----|---|-----|-----|-----|---|------|------|------|
| SER | 185 | OG  | A | PHE | 56  | CE1 | A | 3.34 | phil | phob |
| SER | 185 | OG  | A | THR | 55  | OG1 | A | 2.61 | phil | phil |
| THR | 188 | O   | A | PHE | 189 | CD1 | A | 3.36 | phil | phob |
| PHE | 189 | CE2 | A | PHE | 52  | CB  | A | 3.58 | phob | phob |
| PHE | 189 | CZ  | A | PHE | 48  | CZ  | A | 3.66 | phob | phob |
| PHE | 189 | CD1 | A | THR | 188 | O   | A | 3.36 | phob | phil |
| VAL | 190 | CG2 | A | PHE | 52  | CE1 | A | 3.36 | phob | phob |
| PRO | 192 | O   | A | TRP | 193 | CH2 | A | 3.91 | phob | phil |
| TRP | 193 | CZ3 | A | TRP | 193 | CZ3 | A | 3.48 | phil | phil |
| TRP | 193 | CH2 | A | PRO | 192 | O   | A | 3.91 | phil | phob |
| TRP | 193 | CE2 | A | PHE | 48  | CE2 | A | 3.86 | phil | phob |
| TRP | 193 | CH2 | A | ALA | 196 | CB  | A | 3.62 | phil | phob |
| ALA | 196 | CB  | A | TRP | 193 | CH2 | A | 3.62 | phob | phil |
| PHE | 201 | CZ  | A | LEU | 12  | CD2 | A | 3.99 | phob | phob |
| MET | 205 | CE  | A | LEU | 12  | CD2 | A | 3.74 | phob | phob |
| LYS | 208 | NZ  | A | GLU | 13  | OE2 | A | 2.95 | phil | phil |
| LYS | 208 | CE  | A | LEU | 12  | O   | A | 3.82 | phil | phob |
| LYS | 208 | CE  | A | ARG | 11  | O   | A | 3.54 | phil | phil |
| TRP | 7   | CZ2 | A | PHE | 113 | CE1 | B | 3.52 | phil | phob |

**Table S3.** Inter-monomer Interactions in the Cyt *bc*<sub>1</sub> Complex (PDB ID 3CX5). Abbreviations, res1, res2, residues 1 and 2; Ch.1, Ch.2, Chains 1 and 2; aaProperty, amino acid property (phil, hydrophilic; phob, hydrophobic); #, amino acid number.

| <b>Monomer1</b> |          |                   |   | <b>Monomer2</b> |          |                   |   | <b>aaProperty</b> |              |              |
|-----------------|----------|-------------------|---|-----------------|----------|-------------------|---|-------------------|--------------|--------------|
| <b>Res1</b>     | <b>#</b> | <b>Atom1 Ch.1</b> |   | <b>Res2</b>     | <b>#</b> | <b>Atom2 Ch.2</b> |   | <b>Dist(Å)</b>    | <b>Prop1</b> | <b>Prop2</b> |
| VAL             | 8        | O                 | C | MET             | 199      | CE                | N | 3.80              | phob         | phob         |
| VAL             | 8        | CB                | C | ILE             | 203      | CD1               | N | 3.99              | phob         | phob         |
| TYR             | 9        | OH                | C | ALA             | 200      | CB                | N | 3.47              | phil         | phob         |
| TYR             | 9        | OH                | C | MET             | 196      | O                 | N | 2.62              | phil         | phob         |
| TYR             | 9        | CD2               | C | MET             | 199      | CE                | N | 3.91              | phil         | phob         |
| TYR             | 9        | OH                | C | VAL             | 116      | CG2               | N | 3.50              | phil         | phob         |
| TYR             | 9        | CE1               | C | THR             | 112      | CG2               | N | 3.77              | phil         | phil         |
| LEU             | 12       | CD2               | C | MET             | 199      | CE                | N | 3.70              | phob         | phob         |
| ILE             | 48       | CD1               | C | LEU             | 185      | CG                | N | 3.67              | phob         | phob         |
| MET             | 52       | O                 | C | GLN             | 177      | CB                | N | 3.36              | phob         | phil         |
| MET             | 52       | CE                | C | ARG             | 178      | CB                | N | 3.40              | phob         | phil         |
| TYR             | 54       | O                 | C | GLN             | 177      | NE2               | N | 3.27              | phil         | phil         |
| SER             | 55       | OG                | C | ASN             | 57       | ND2               | N | 2.83              | phil         | phil         |
| SER             | 55       | OG                | C | GLN             | 177      | NE2               | N | 3.04              | phil         | phil         |
| ASN             | 57       | ND2               | C | LEU             | 60       | CD1               | N | 3.88              | phil         | phob         |
| ASN             | 57       | ND2               | C | SER             | 55       | OG                | N | 2.82              | phil         | phil         |
| ASN             | 57       | OD1               | C | ASN             | 57       | OD1               | N | 3.70              | phil         | phil         |
| LEU             | 60       | CD2               | C | ASN             | 57       | OD1               | N | 3.88              | phob         | phil         |
| LEU             | 60       | CD2               | C | LEU             | 60       | CD1               | N | 3.69              | phob         | phob         |
| THR             | 112      | CG2               | C | TYR             | 9        | CE1               | N | 3.68              | phil         | phil         |
| VAL             | 116      | CG2               | C | TYR             | 9        | OH                | N | 3.61              | phob         | phil         |
| GLN             | 177      | NE2               | C | TYR             | 54       | O                 | N | 3.33              | phil         | phil         |
| GLN             | 177      | CB                | C | MET             | 52       | O                 | N | 3.26              | phil         | phob         |
| GLN             | 177      | NE2               | C | SER             | 55       | OG                | N | 2.91              | phil         | phil         |
| ARG             | 178      | N                 | C | MET             | 52       | O                 | N | 3.70              | phil         | phob         |
| ALA             | 181      | O                 | C | TYR             | 184      | OH                | N | 2.76              | phob         | phil         |
| LEU             | 182      | CD1               | C | MET             | 52       | CE                | N | 3.91              | phob         | phob         |
| TYR             | 184      | OH                | C | ALA             | 181      | O                 | N | 2.70              | phil         | phob         |
| TYR             | 184      | CD1               | C | TYR             | 184      | CD1               | N | 3.70              | phil         | phil         |
| TYR             | 184      | OH                | C | LEU             | 185      | CB                | N | 3.50              | phil         | phob         |
| LEU             | 185      | CB                | C | TYR             | 184      | OH                | N | 3.54              | phob         | phil         |
| LEU             | 185      | CD2               | C | PHE             | 188      | CZ                | N | 3.89              | phob         | phob         |
| PHE             | 188      | CZ                | C | LEU             | 185      | CD2               | N | 3.83              | phob         | phob         |
| MET             | 196      | O                 | C | TYR             | 9        | OH                | N | 2.67              | phob         | phil         |
| MET             | 199      | CE                | C | VAL             | 8        | O                 | N | 3.81              | phob         | phob         |
| MET             | 199      | CE                | C | LEU             | 12       | CD1               | N | 3.59              | phob         | phob         |
| MET             | 199      | CE                | C | TYR             | 9        | CD2               | N | 3.99              | phob         | phil         |
| ALA             | 200      | CB                | C | TYR             | 9        | OH                | N | 3.46              | phob         | phil         |
| ILE             | 203      | CD1               | C | VAL             | 8        | CB                | N | 3.90              | phob         | phob         |

## SUPPLEMENTARY FIGURE LEGENDS

**Figure S1.** Bent trans-membrane helix of the ISP subunit (pink) in the cyt *b<sub>6</sub>f* complex (PDB ID 4OGQ). The PetL subunit (light brown) interacts with the ISP TMH on the n-side, through an ordered UDM detergent molecule (black/red sticks).

**Figure S2.** Low resolution mass spectroscopy (ESI-MS) analysis of the truncated ISP subunit from *F. diplosiphon*.

**Figure S3.** High resolution mass spectroscopy (ESI-MS) analysis of the truncated ISP subunit from *F. diplosiphon*. Ion-isolation of 14-charge precursor (inset) and electron-transfer dissociation tandem mass spectrum are shown.

**Figure S4.** Low resolution mass spectroscopy (ESI-MS) analysis of the full-length ISP subunit from *F. diplosiphon*.

**Figure S5.** High resolution mass spectroscopy (ESI-MS) analysis of the PetG subunit from *F. diplosiphon*. Ion-isolation of 3-charge precursor ion (inset) and collisionally activated dissociation tandem mass spectrum of the ion are shown.

**Figure S6.** High resolution mass spectroscopy (ESI-MS) analysis of the PetM subunit from *F. diplosiphon*. Ion-isolation of 3-charge precursor ion (inset) and collisionally activated dissociation tandem mass spectrum of the ion are shown.

**Figure S7.** High resolution mass spectroscopy (ESI-MS) analysis of the PetL subunit from *F. diplosiphon*. Ion-isolation of 3-charge precursor ion (inset) and collisionally activated dissociation tandem mass spectrum of the ion are shown.

**Figure S8.** High resolution mass spectroscopy (ESI-MS) analysis of the PetN subunit from *F. diplosiphon*. Ion-isolation of 3-charge precursor ion (inset) and collisionally activated dissociation tandem mass spectrum of the ion are shown.

**Figure S9.** High-resolution top-down mass spectrometry of small sub-units of *F. diplosiphon* SF33 *b<sub>6</sub>f* complex. Selected fractions from LC-MS+ analysis were analyzed by static nanospray according to *Materials and Methods*. Product ion assignments for known proteins were made using ProSightPC operated in single protein mode with a 15-ppm mass accuracy threshold and with the delta mass feature deactivated. Product ion assignments from collisional activated dissociation (CAD) experiments are labeled with 135° slashes to the top left (*b*-ions) or

bottom right ( $\gamma$ -ions) and from electron transfer dissociation (ETD) experiments with 90° slashes to the top left ( $c$ -ions) or bottom right ( $z$ -ions), as described in the main text<sup>64</sup>. **(A)** The 14579 Da component (**Table 1**) matched to 46 product-ions of electron transfer dissociation of a precursor-ion of monoisotopic mass 14567.0896 Da for a P-Score of  $2.2 \times 10^{-43}$  identifying this species as an N-terminal truncation product of the Rieske subunit. **(B)** Cleavage site of ISP subunit in cyt  $b_6f$  complex (PDB ID 2E74). Tyr41 and Phe42 are located proximal to the membrane-water interface. **(C)** The 4026 Da component matched to 41 product-ions of collisionally activated dissociation (CAD) of a precursor-ion of monoisotopic mass of 4023.1578 Da for a P-Score of  $3.32 \times 10^{-64}$  identifying this species as *F. diplosiphon* SF33 PetG. Shading of the initiating Met residue indicates formylation. **(D)** The 3578 Da component matched to 16 product-ions of collisionally activated dissociation (CAD) of a precursor-ion of monoisotopic mass of 3575.8351 Da for a P-Score of  $7.8 \times 10^{-23}$  when matched to the *Nostoc azollae* PetM sequence, identifying this species as *F. diplosiphon* SF33 PetM. **(E)** The 3255 Da component matched to 27 product-ions of collisionally activated dissociation (CAD) of a precursor-ion of monoisotopic mass of 3256.0387 Da for a P-Score of  $2.6 \times 10^{-53}$  when matched to a custom PetL sequence, identifying this species as *F. diplosiphon* SF33 PetL. **(F)** The 3261 Da component matched to 33 product-ions of collisionally activated dissociation (CAD) of a precursor-ion of monoisotopic mass of 3259.7588 Da for a P-Score of  $5.6 \times 10^{-46}$  identifying this species as PetN of *F. diplosiphon* SF33.

**Figure S10.** Alignment of cyt  $b_6$  polypeptide sequences from unicellular prokaryotes (*Synechocystis* PCC 6803, and *Synechococcus* PCC 7002), filamentous prokaryotes (*Nostoc* PCC 7120, *Fremyella diplosiphon* SF33, and *Mastigocladus laminosus*), a unicellular eukaryotic alga (*Chlamydomonas reinhardtii*), and higher eukaryotes (*Arabidopsis thaliana*, and *Spinacia oleracea*) sources. Secondary structure assignment and residue numbering are based on the cyt  $b_6f$  complex crystal structure from *Nostoc* PCC 7120 (PDB ID 4OGQ, chain A). Residues involved in inter-monomer contacts are highlighted with arrows. Color code: red- complete conservation, yellow- partial conservation, and white- no conservation.

**Figure S11.** Alignment of subIV polypeptide sequences from unicellular prokaryotes (*Synechocystis* PCC 6803, and *Synechococcus* PCC 7002), filamentous prokaryotes (*Nostoc* PCC 7120, *Fremyella diplosiphon* SF33, and *Mastigocladus laminosus*), a unicellular eukaryotic alga (*Chlamydomonas reinhardtii*), and higher eukaryotes (*Arabidopsis thaliana*, and *Spinacia oleracea*) sources. Secondary structure assignment and residue numbering are based on the cyt  $b_6f$  complex crystal structure from *Nostoc* PCC 7120 (PDB ID 4OGQ, chain B). Residues

involved in inter-monomer contacts are highlighted with arrows. Color code: red- complete conservation, yellow- partial conservation, and white- no conservation.

**Figure S12.** Alignment of cyt  $b_6$  polypeptide sequence (from the cyt  $b_6f$  complex) with the homologous N-terminal domain of the cyt  $b$  subunit (of the cyt  $bc_1$  complex). Sequences of the cyt  $b$  ( $bc_1$ ) polypeptide represent prokaryotic anoxygenic photosynthetic bacteria (*Rhodobacter capsulatus*, and *Rhodobacter sphaeroides*), a unicellular eukaryote (*Saccharomyces cerevisiae*), and higher eukaryotes (*Gallus gallus*, and *Bos taurus*). Residue numbering is follows the sequence of the cyt  $b_6$  polypeptide from *Nostoc* PCC 7120. Residues involved in inter-monomer interactions in the cyt  $b_6f$  complex of *Nostoc* PCC 7120 (PDB ID 4OGQ) are highlighted with arrows. Color code: red- complete conservation, yellow- partial conservation, and white- no conservation. For clarity, partial sequences of the cyt  $b$  polypeptide, which shares homology with the cyt  $b_6$  subunit, are shown in the figure.

**Figure S13.** Alignment of subIV polypeptide sequence (from the cyt  $b_6f$  complex) with the homologous C-terminal domain of the cyt  $b$  subunit (of the cyt  $bc_1$  complex). Sequences of the cyt  $b$  ( $bc_1$ ) polypeptide represent prokaryotic anoxygenic photosynthetic bacteria (*Rhodobacter capsulatus*, and *Rhodobacter sphaeroides*), a unicellular eukaryote (*Saccharomyces cerevisiae*), and higher eukaryotes (*Gallus gallus*, and *Bos taurus*). Residue numbering is follows the sequence of the subIV polypeptide from *Nostoc* PCC 7120. The residue involved in inter-monomer interactions in the cyt  $b_6f$  complex of *Nostoc* PCC 7120 (PDB ID 4OGQ) is highlighted with an arrow. Color code: red- complete conservation, yellow- partial conservation, and white- no conservation. For clarity, partial sequences of the cyt  $b$  polypeptide, which shares homology with the subIV polypeptide, are shown in the figure.

**Figure S1**

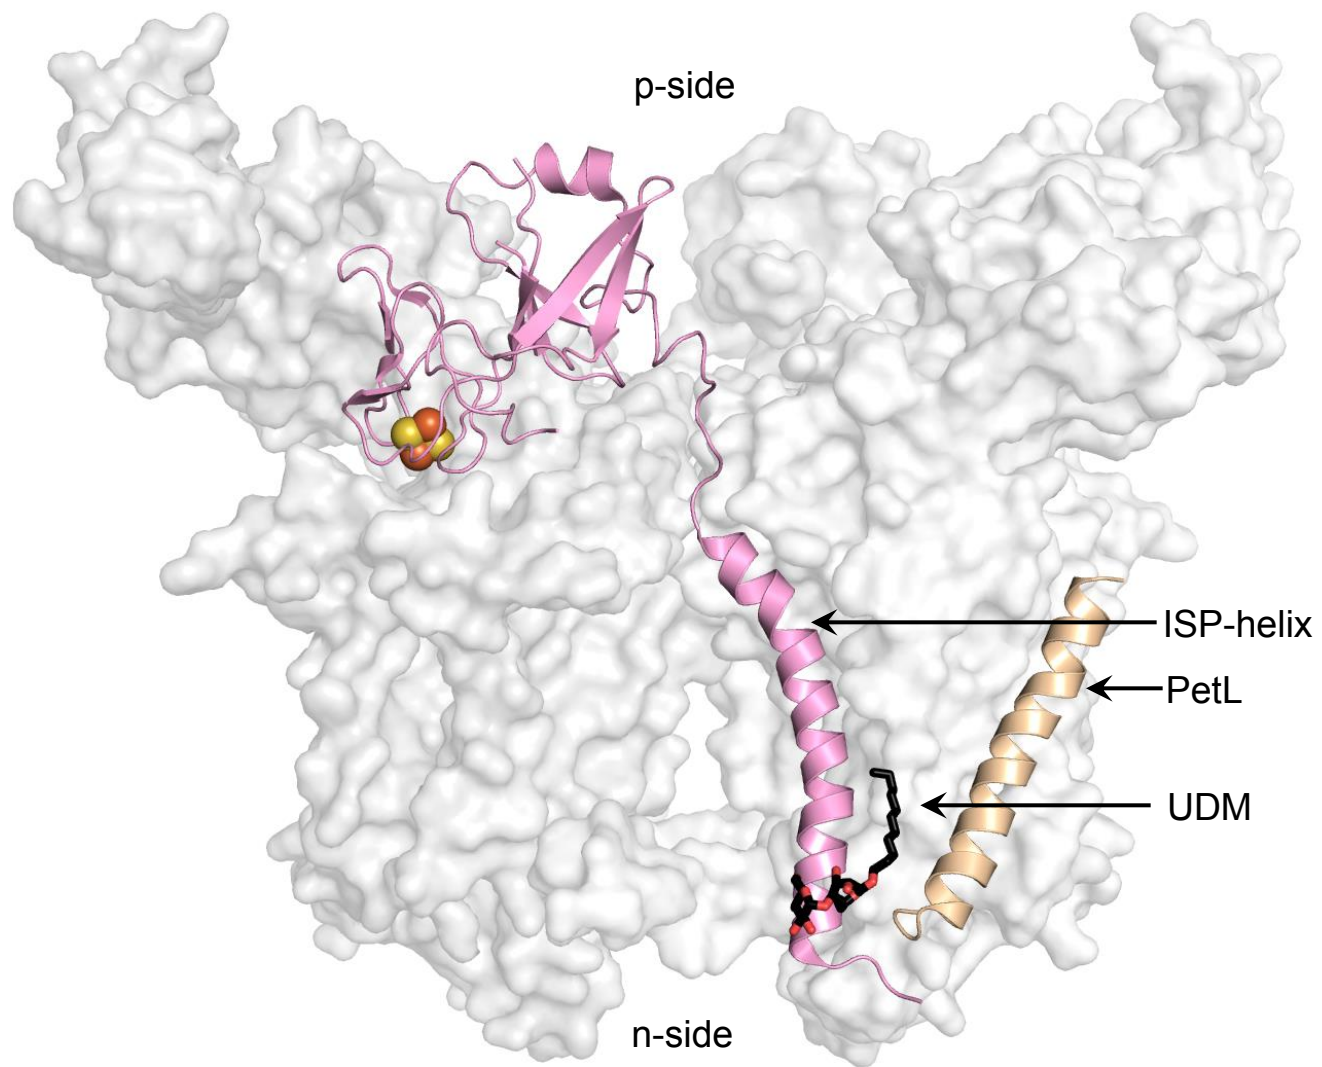



Figure S2

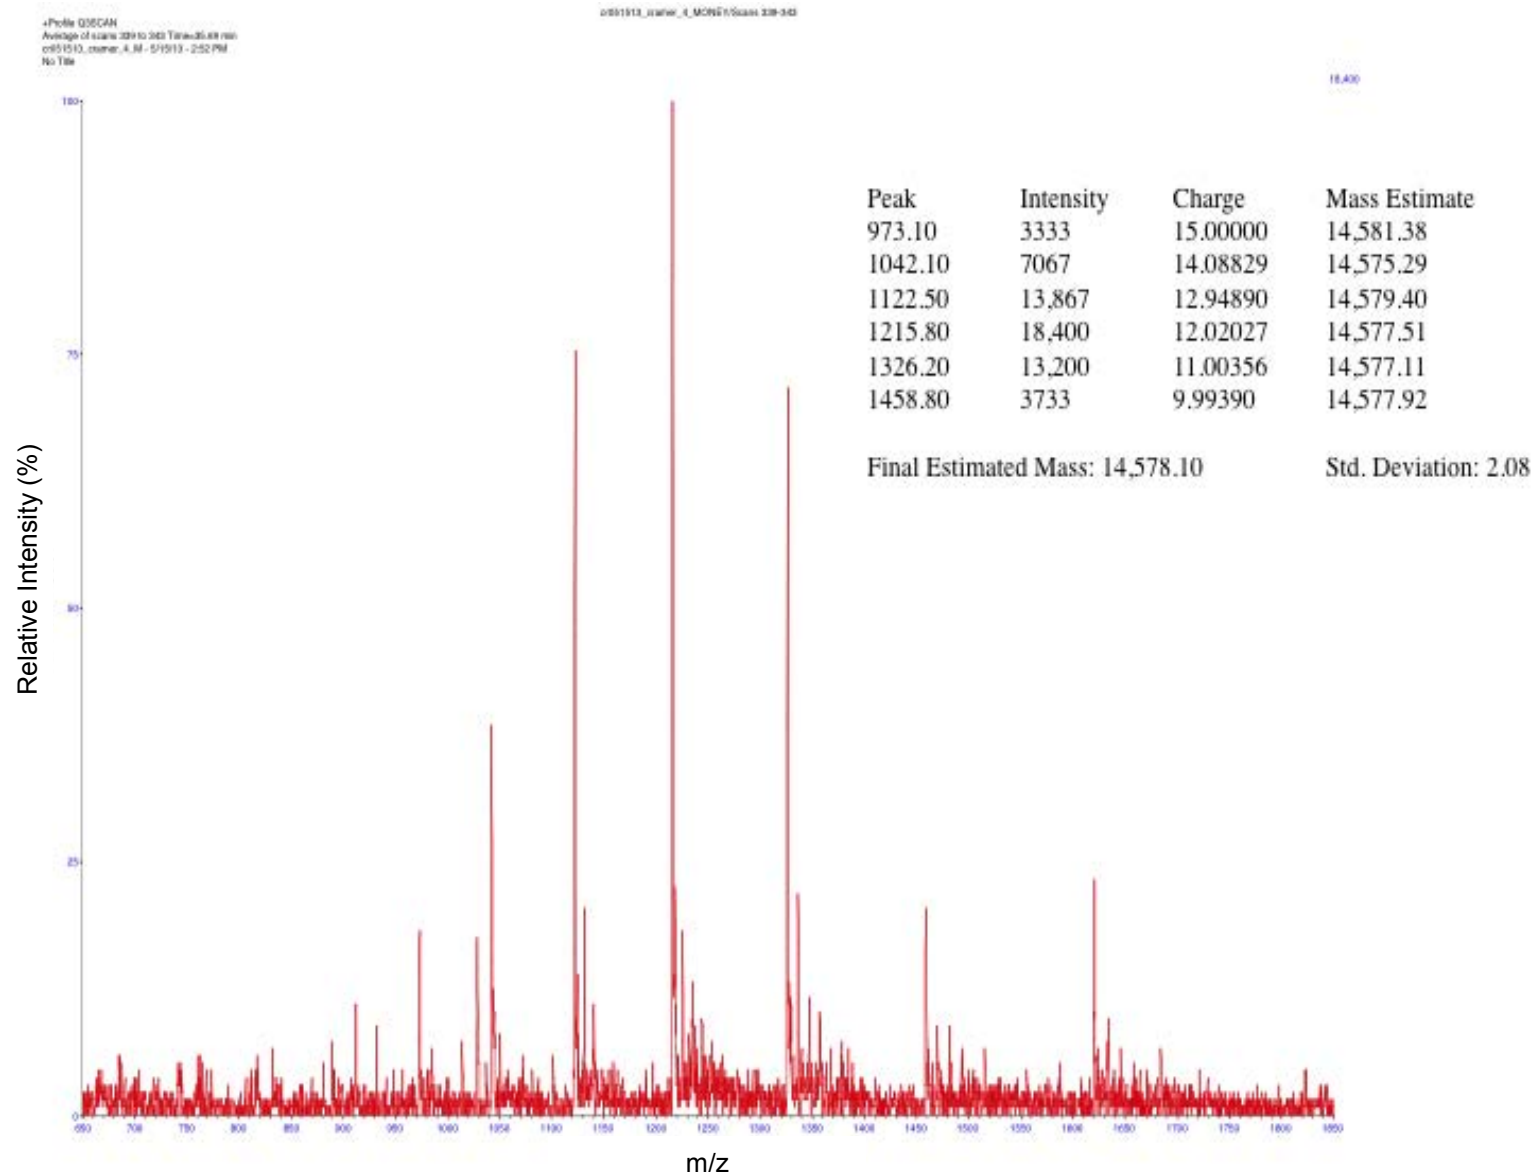

Figure S3

jpwCRAMER071613\_sf33\_36\_1042etd\_400tr #1 RT AV: 1 NL: 5.46E4  
T: FTMS + p NSI Full ms2 1042.50@etd4.00 [285.00-2000.00]

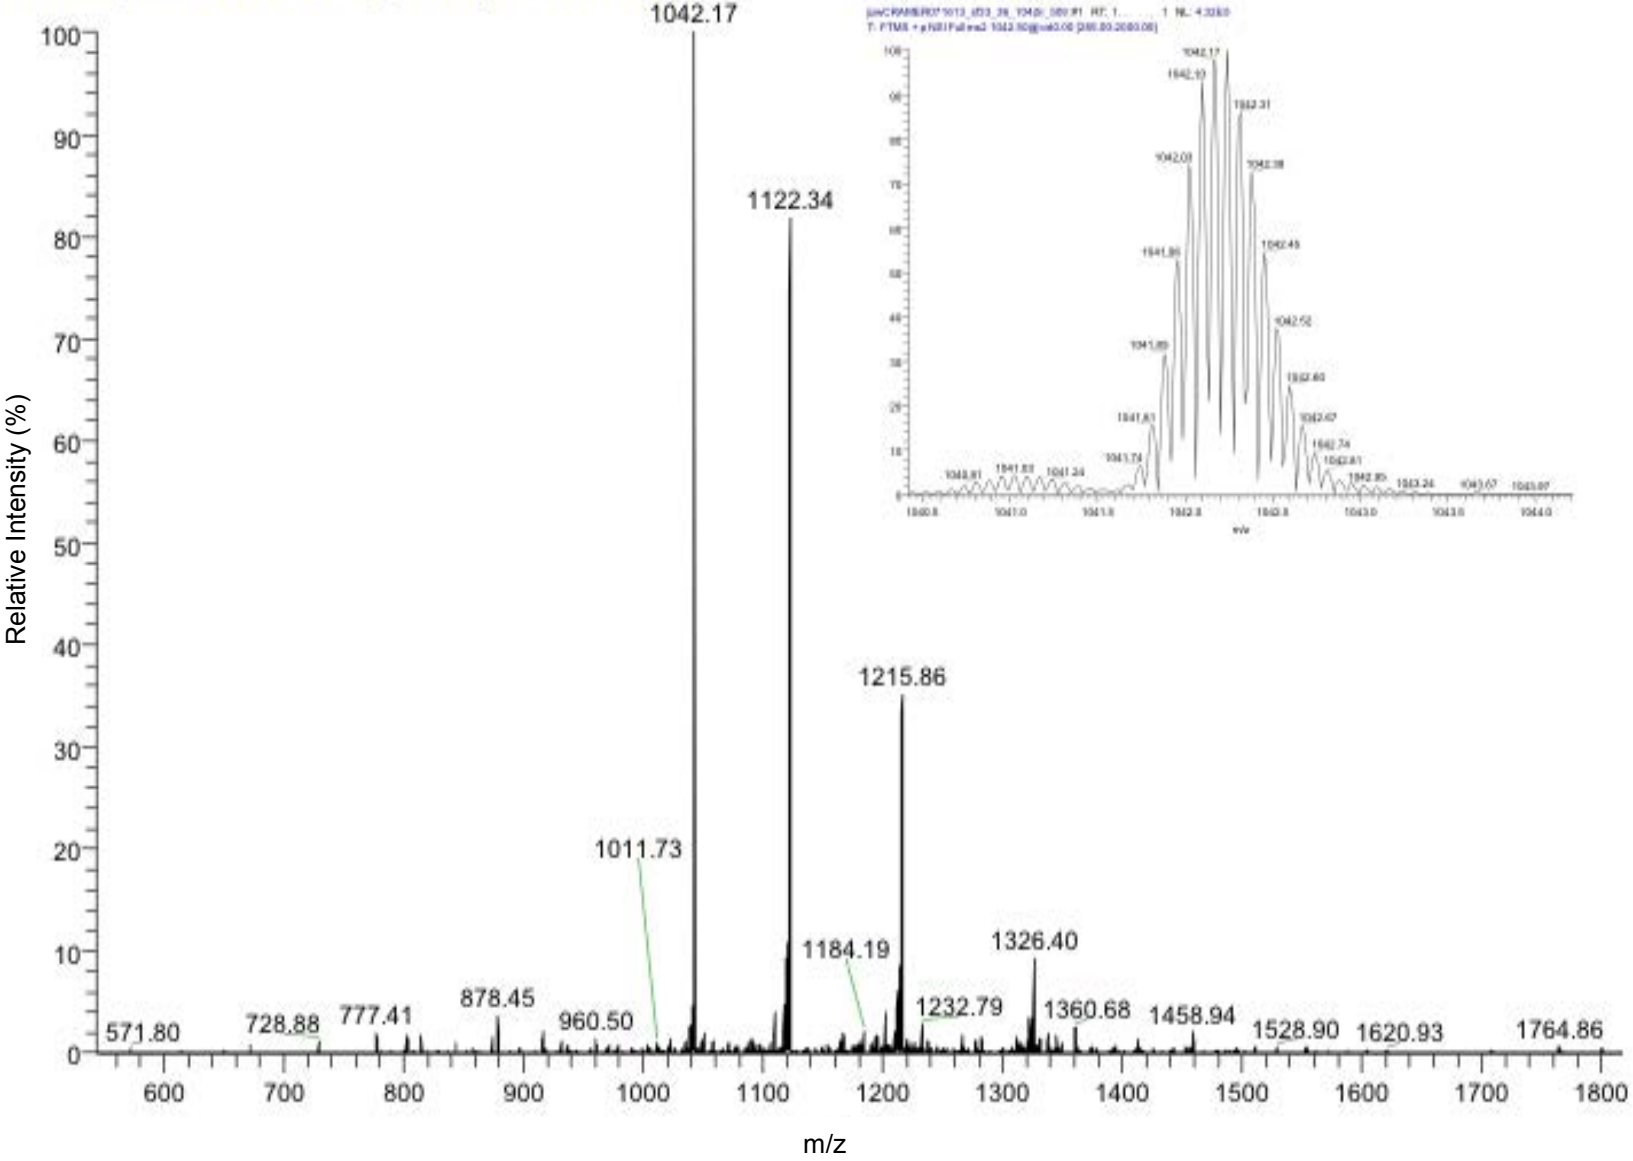

# Figure S4

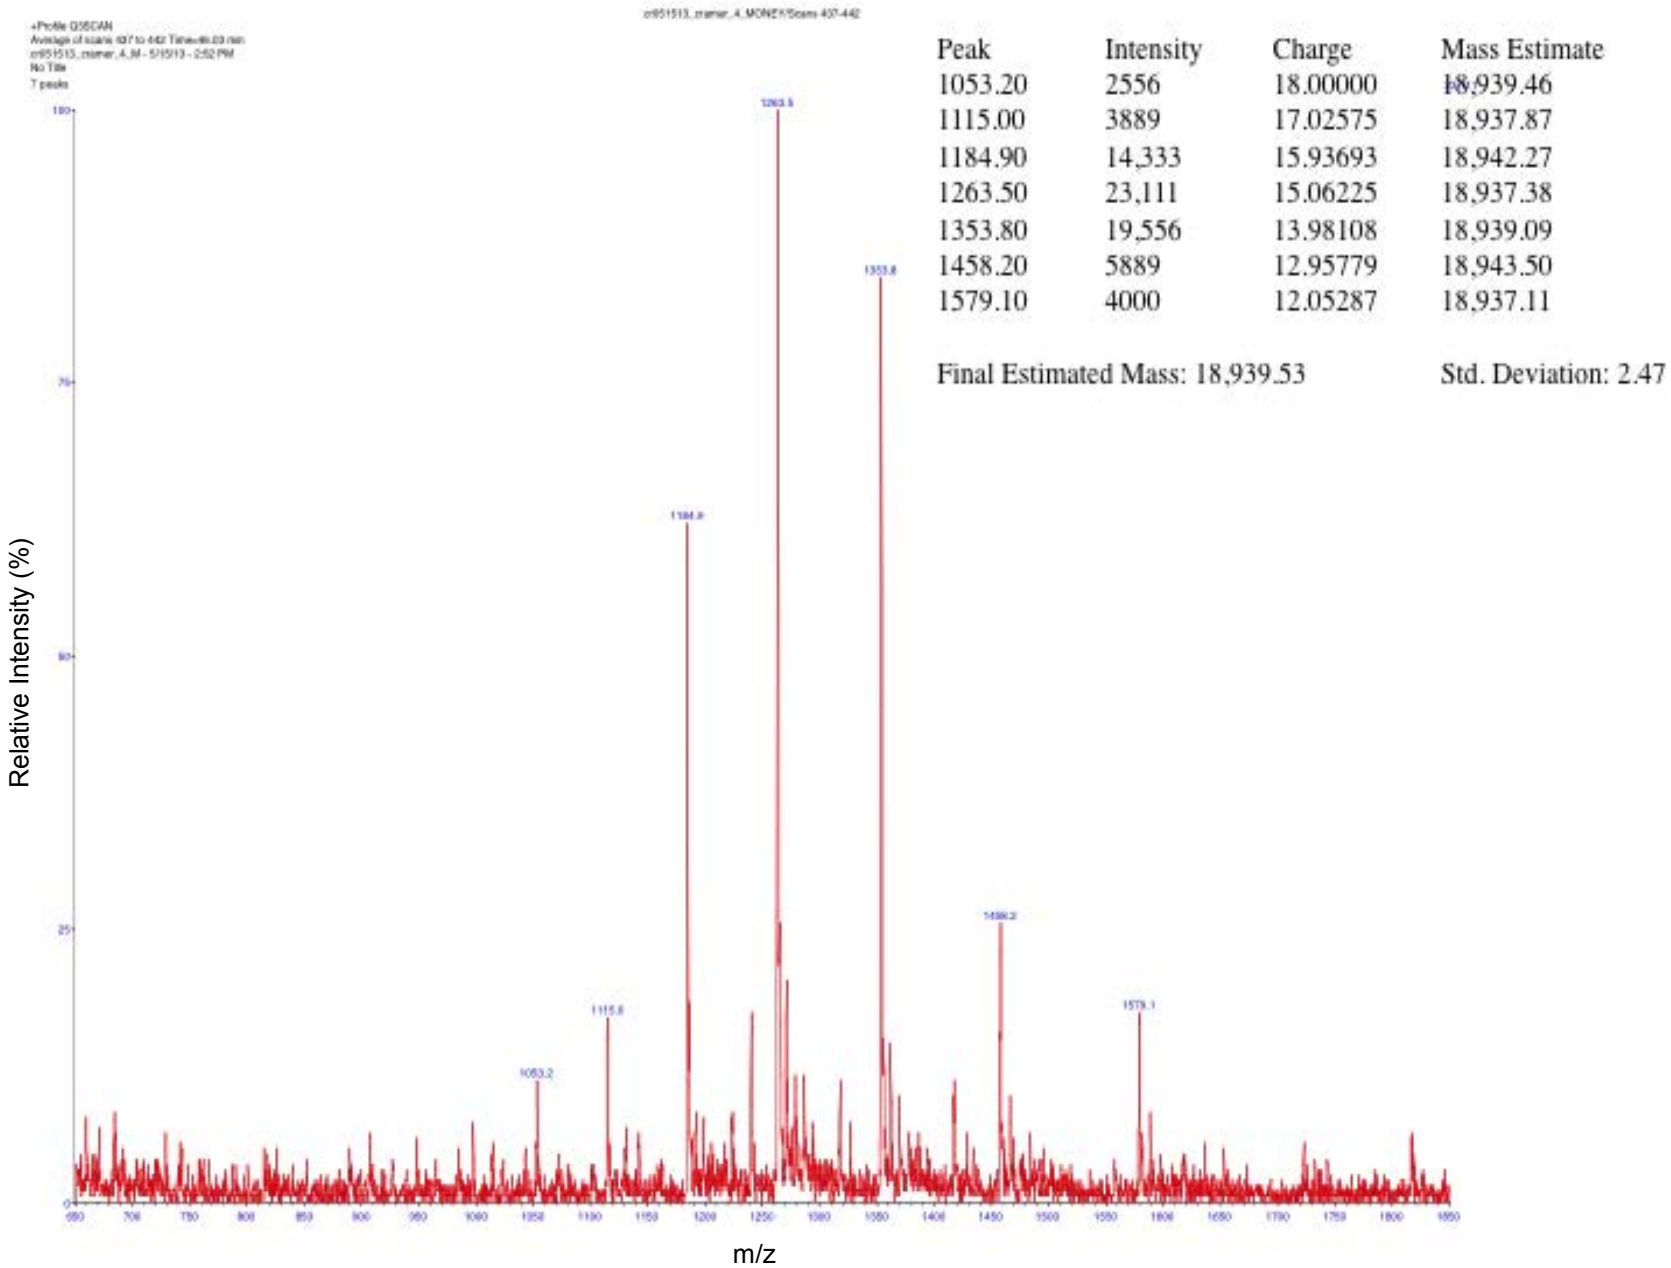

Figure S5

jpwCRAMER071613\_sf33\_84\_1342cad\_70tr #1 RT: .V: 1 NL: 1.59E5  
T: FTMS + p NSI Full ms2 1342.70@cid20.00 [365.00-2000.00]

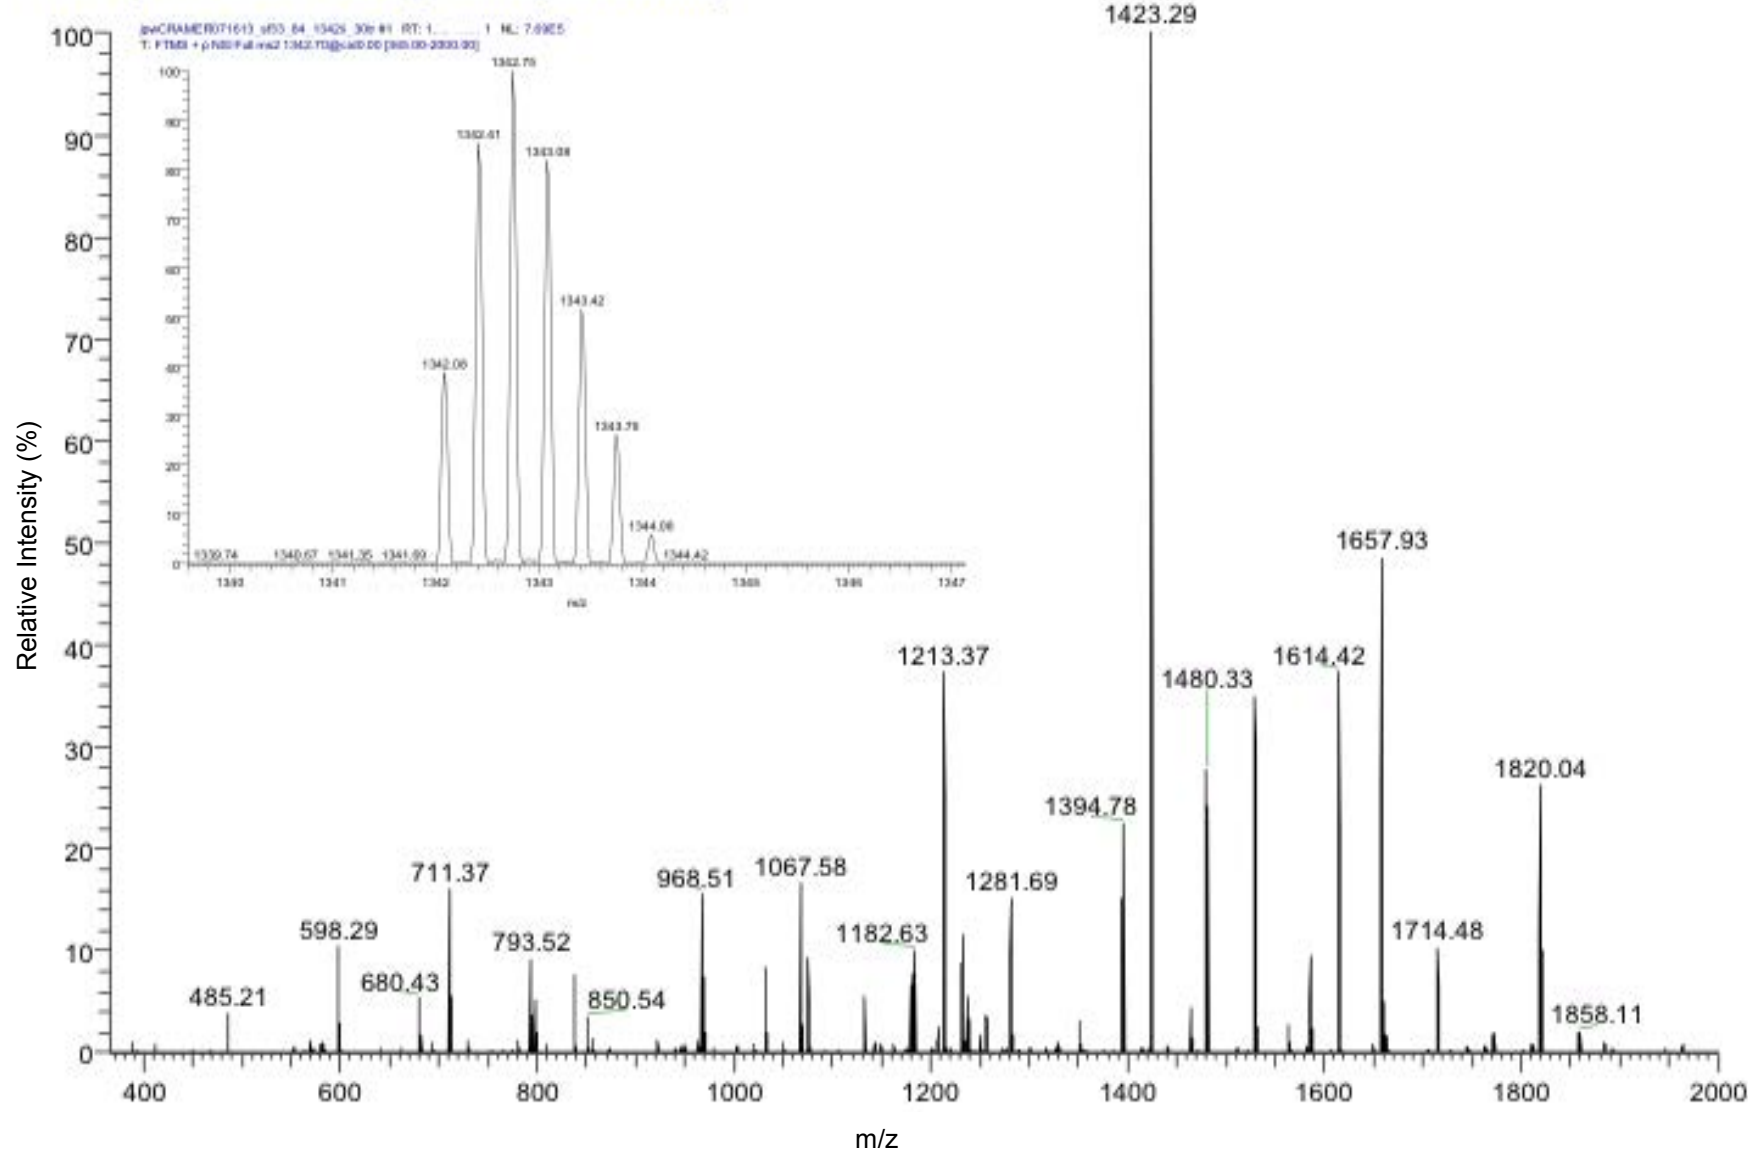

Figure S6

pwCRAMER071613\_sf33\_97\_1193cadext\_60tr #1 F AV: 1 NL: 1.16E5  
T: FTMS + p NSI Full ms2 1194.20@cid20.00 [325.00-4000.00]

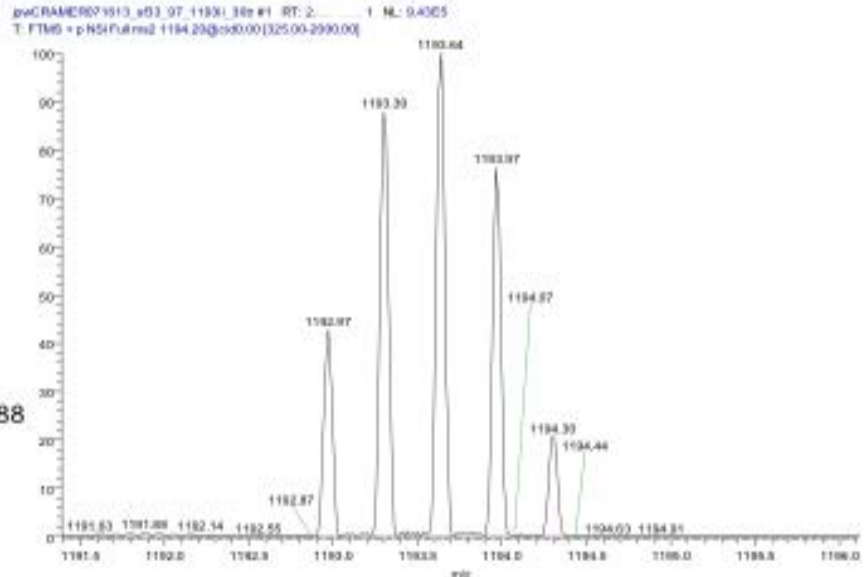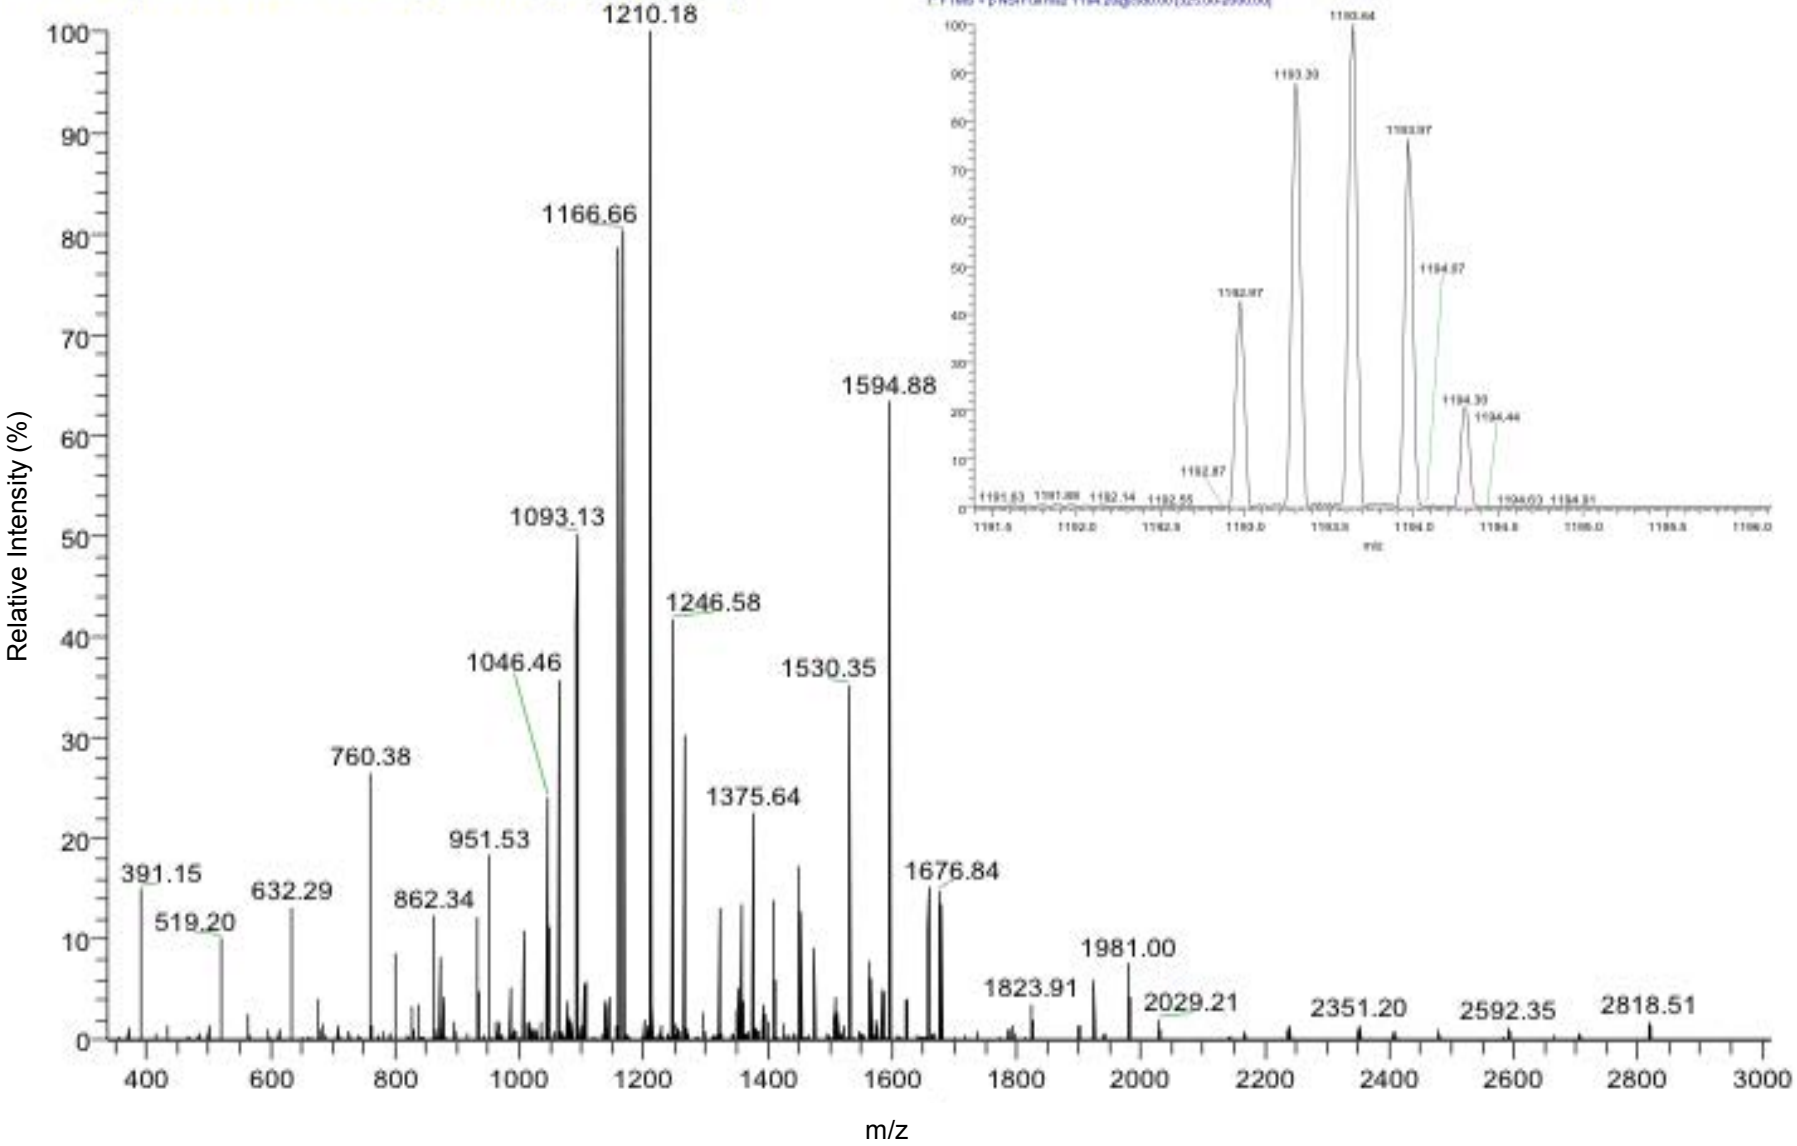

# Figure S7

jpwCRAMER071613\_sf33\_99\_1627cadext\_100tr #1 RT: 9.75 AV: 1 NL: 1.34E4  
T: FTMS + p NSI Full ms2 1628.00@cid22.00 [445.00-4000.00]

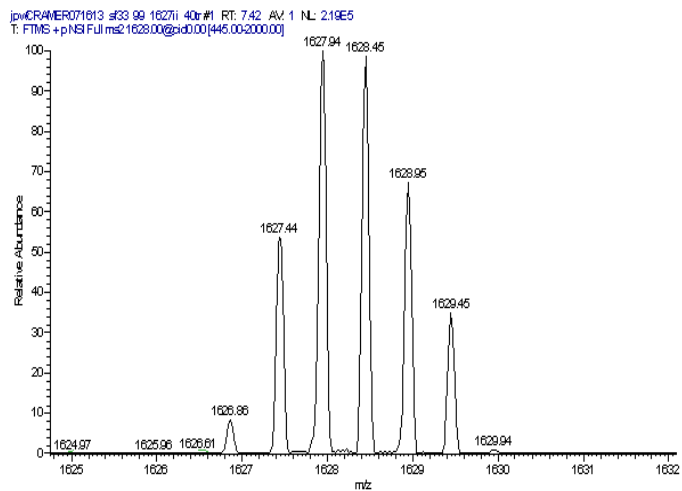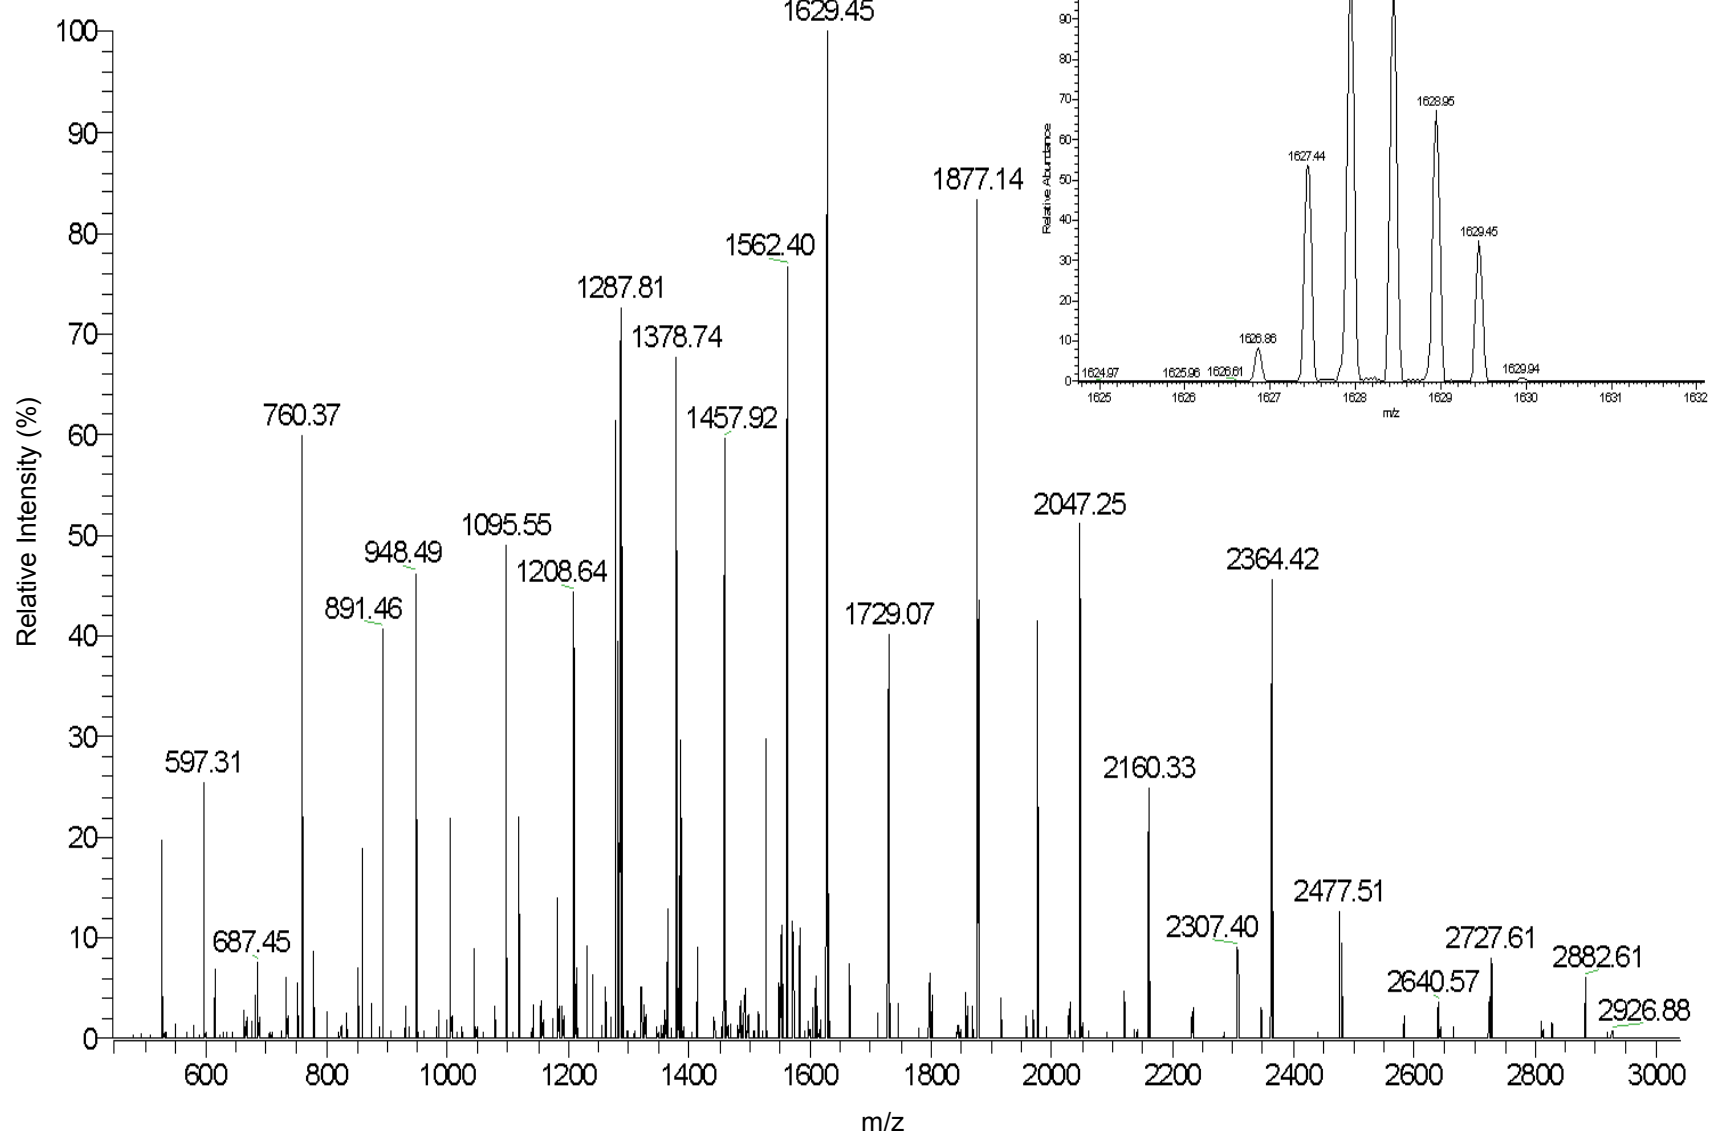

# Figure S8

jpwCRAMER071613\_sf33\_107on\_1088cad\_120tr #1 RT: 7.22 AV: 1 NL: 5.06E4  
T: FTMS + p NSI Full ms2 1089.20@cid20.00 [295.00-2000.00]

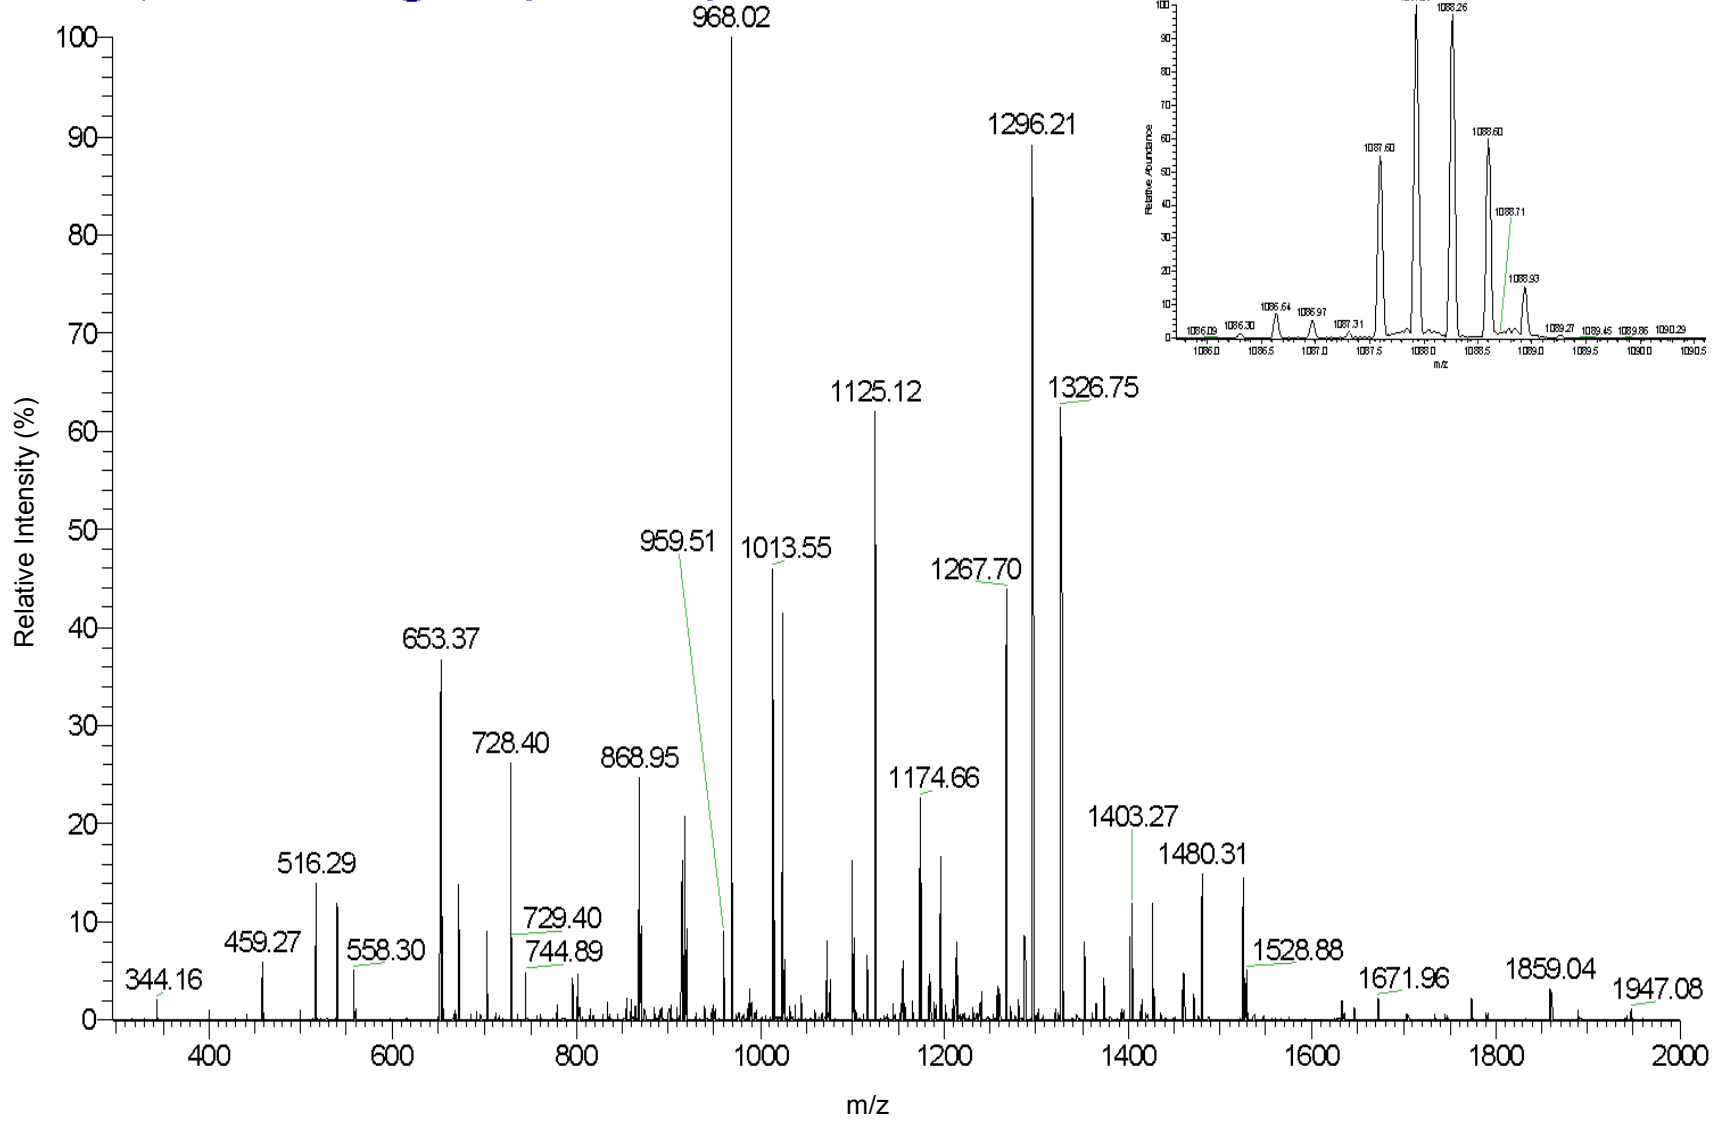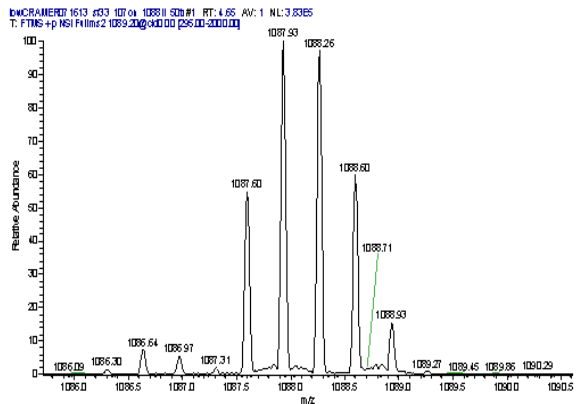

# Figure S9

**A** c1 - F L I - P - P - A - A - G - G - A - G - G - G - A - T A - K D E - L - G L N - D - V - S - V - z114  
c26 - S - K - F L L A - S - H - N - V - G - D R S - L - V Q L G L - K - G L D - P - T Y L - z89  
c51 - V V - E - S - K - E - A - I - G D - Y - G - I - N - A - I - C - T - H - L - G - C - V - V - P - z64  
c76 - W - N - V - A - E - N - K - F - K - C - P - C - H - G - S - Q - Y D L A - T G L K - V - V - R L - z39  
c101 - G - P L A - P - L - S - L A L - A - H - T - K - V - E - D D - K - V - V - V - T - P - W - T - z14  
c126 - E - T - D - F - R - T - G - E - E - P - W - W - A - z1

**C** b1 - M V E P L L S G I V L G L - I V V T L S G - L F Y A - A - y13  
b26 - Y - K Q Y - K R - P - T - E - L - G - G - y1

**D** b1 - M - G - S - E - I - L - N - A - A - M L S - F G L I F V G W - G - I - G - A - L - y10  
b26 - L - L - K - I - Q - G - A - E E - y1

**E** b1 - M A - V V V S Y I G F I A V F T G I A V G - L L - F G - L - y7  
b26 - R - S - A - K - I - I - y1

**F** b1 - M - A - I L T L G W V S L L V V F T W - S - I - A M - V V W G - y5  
b26 - R N - G - L - y1

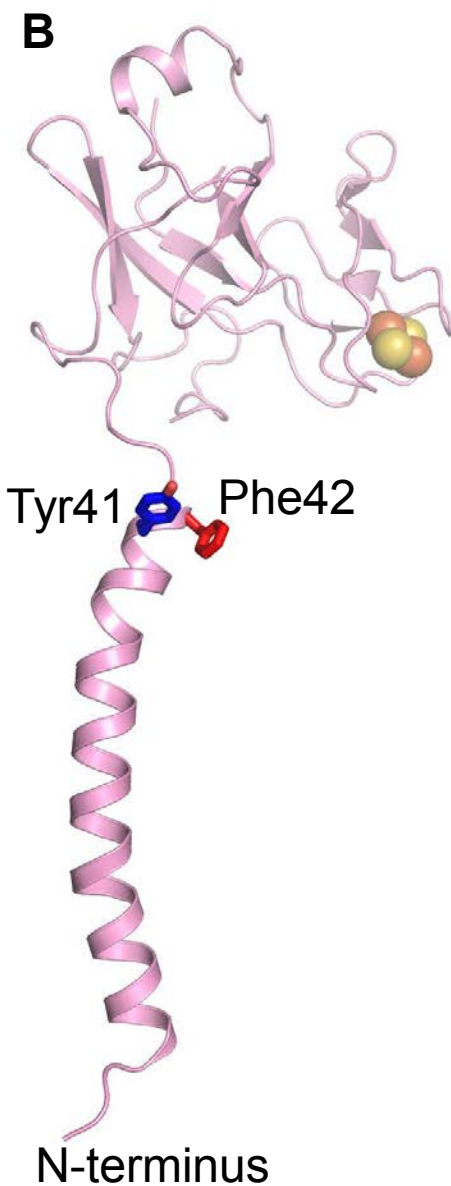



# Figure S10

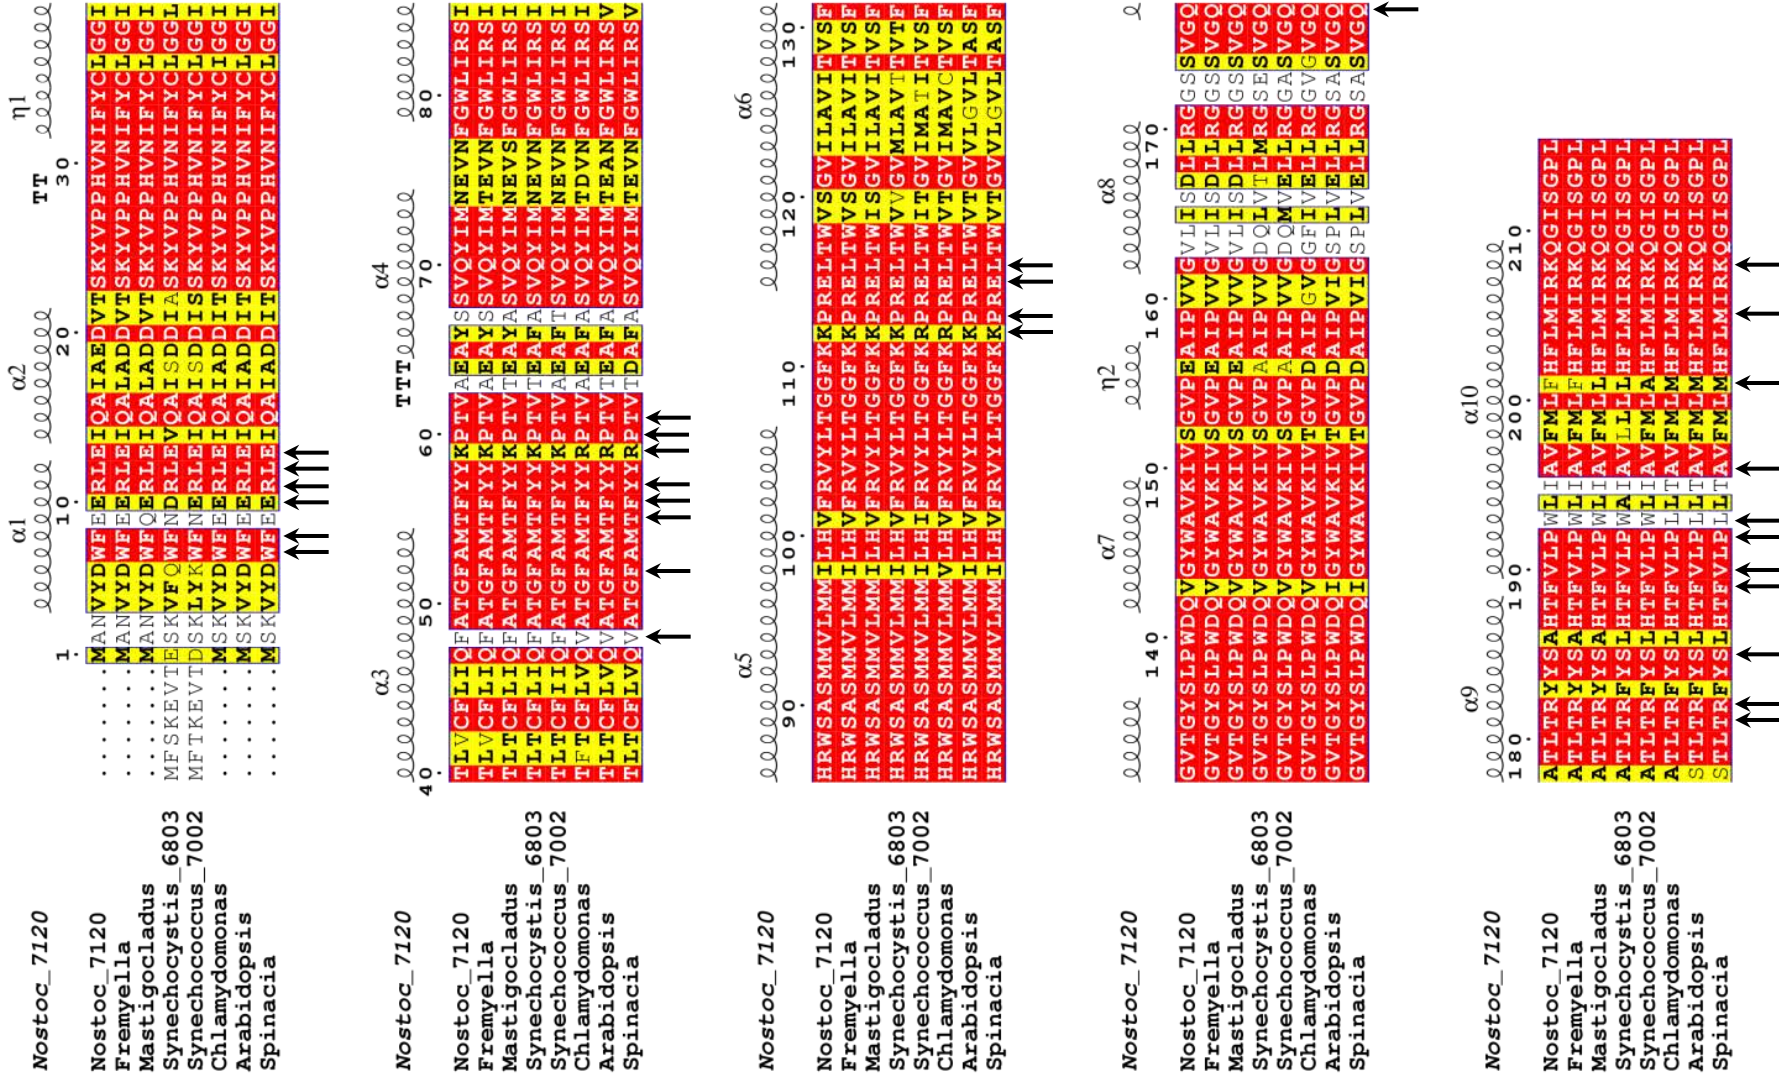

# Figure S11

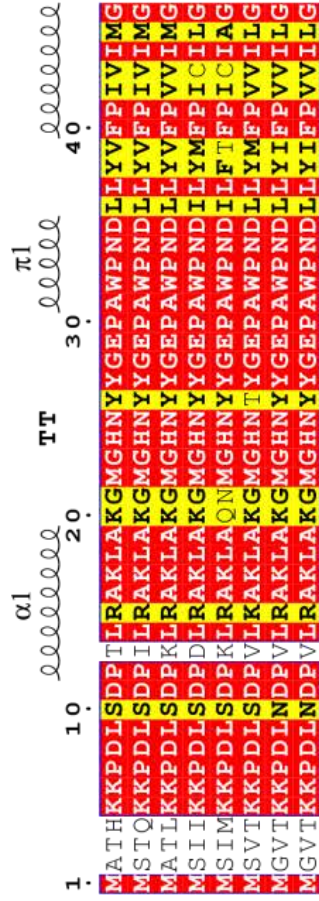

Nostoc\_7120  
 Nostoc\_7120  
 Fremyella  
 Mastigocladus  
 Synechocystis\_6803  
 Synechococcus\_7002  
 Chlamydomonas  
 Arabidopsis  
 Spinacia

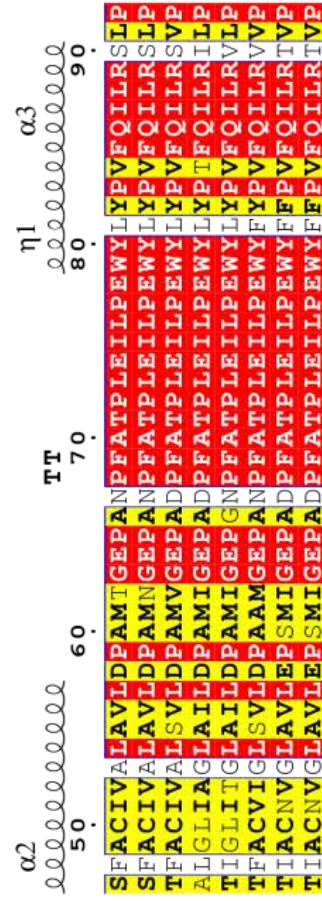

Nostoc\_7120  
 Nostoc\_7120  
 Fremyella  
 Mastigocladus  
 Synechocystis\_6803  
 Synechococcus\_7002  
 Chlamydomonas  
 Arabidopsis  
 Spinacia

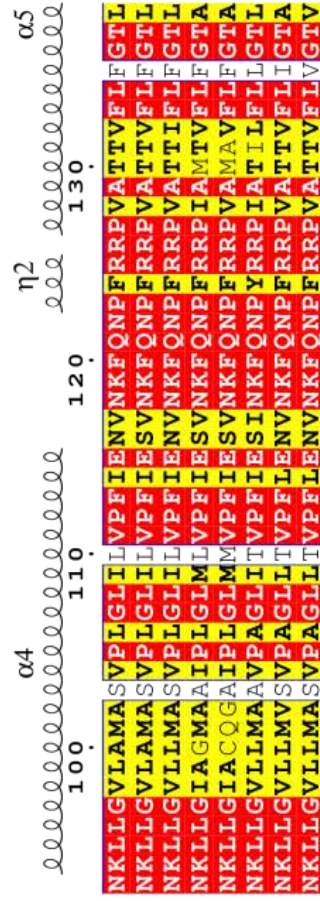

Nostoc\_7120  
 Nostoc\_7120  
 Fremyella  
 Mastigocladus  
 Synechocystis\_6803  
 Synechococcus\_7002  
 Chlamydomonas  
 Arabidopsis  
 Spinacia

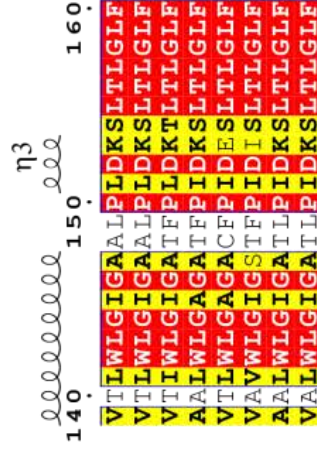

Nostoc\_7120  
 Nostoc\_7120  
 Fremyella  
 Mastigocladus  
 Synechocystis\_6803  
 Synechococcus\_7002  
 Chlamydomonas  
 Arabidopsis  
 Spinacia



# Figure S12

Nostoc\_cytb6  
 Rhodobacter\_sph  
 Rhodobacter\_cap  
 Saccharomyces  
 Gallus  
 Bos\_taurus

1 10 20 30  
 .....MANVYDWF**E**ERLEIQAI**A**EDVTSK**Y**VFP**H**VN**I**F**Y**C  
 MSGIPHDHYEPR**T**IEK**W**L**H**SR**L**P**I**VAL**A**YDT**I**MI**P**TP**R**PNLN**W**MI  
 MSGIPHDHYE**P**KT**G**IEK**W**L**H**DR**L**P**I**VL**G**L**V**YDT**I**MI**P**TP**K**NLN**W**WI  
 .....MAFR**K**SN**V**YLSLVNS**Y**II**D**SP**Q**PS**S**IN**Y**W**W**N  
 .....MAPNIR**K**SH**P**L**L**K**M**IN**S**L**L**DL**P**AP**S**NIS**A**W**W**N  
 .....MTNIR**K**SH**P**L**L**M**K**IV**N**NA**F**II**D**LP**AP**SS**NIS**W**W**N

↑↑↑↑  
 ↑↑↑↑

Nostoc\_cytb6  
 Rhodobacter\_sph  
 Rhodobacter\_cap  
 Saccharomyces  
 Gallus  
 Bos\_taurus

40 50 60 70 80  
 LGG**I**TLV**C**FL**I**Q**E**AT**G**FAM**T**F**Y**Y**K**PTVA**E**AYSS**V**Q**Y**IM**N**EV**N**F**G**W**L**  
 WGV**V**L**A**F**C**LV**L**Q**I**V**T**GI**V**L**A**M**H**Y**T**PHVD**L**AF**A**SV**E**HI**M**R**N**V**G**F**M**  
 WGI**V**L**A**F**T**LV**L**Q**I**V**T**GI**V**L**A**M**H**Y**T**PHVD**L**AF**A**SV**E**HI**M**R**D**V**G**W**A**  
 MGS**L**L**G**L**C**LV**I**Q**I**V**T**GI**F**M**A**M**H**Y**S**SNIE**L**AF**S**VE**H**I**M**R**D**V**H**N**G**Y**I**  
 FGS**L**L**A**V**CL**M**T**Q**I**L**T**GL**L**L**A**M**H**Y**T**AD**T**SL**A**F**S**VA**H**HT**CR**N**V**Q**Y**W**L**  
 FGS**L**L**G**I**CL**L**I**Q**I**L**T**GL**L**L**A**M**H**Y**T**SD**T**IT**A**F**S**SV**T**HI**CR**D**V**N**Y**W**I**

↑↑↑↑  
 ↑↑↑↑  
 ↑↑↑↑  
 ↑↑↑↑

Nostoc\_cytb6  
 Rhodobacter\_sph  
 Rhodobacter\_cap  
 Saccharomyces  
 Gallus  
 Bos\_taurus

90 100 110 120  
 I**R**S**I**H**R**W**S**A**S**M**M**V**L**M**I**L**H**V**F**R**V**Y**L**T**G**G**F**KK**P**RE**L**T**W**V**S**G**V**I**L**A**V**I  
 L**R**Y**L**H**A**NG**A**S**L**F**F**I**A**V**Y**L**H**I**F**R**G**L**Y**Y**G**S**Y**K**A**P**R**E**V**T**W**I**V**G**M**L**I**Y**L**A  
 M**R**Y**I**H**A**NG**A**S**L**F**F**L**A**V**Y**I**H**I**F**R**G**L**Y**Y**G**S**Y**K**A**P**R**E**I**T**W**I**V**G**M**V**I**Y**L**L  
 L**R**Y**L**H**A**NG**A**S**F**F**F**M**F**M**H**M**A**K**G**L**Y**Y**G**S**Y**R**S**P**R**V**T**L**N**V**G**V**I**I**F**I**L**  
 I**R**N**L**H**A**NG**A**S**F**F**I**C**I**F**L**H**I**G**R**G**L**Y**Y**G**S**Y**L**Y**..**KE**T**W**N**I**G**V**I**L**L**L**T**  
 I**R**Y**M**H**A**NG**A**S**M**F**F**I**C**L**Y**M**H**V**G**R**G**L**Y**Y**G**S**Y**T**F**..LE**T**W**N**I**G**V**I**L**L**L**T**

↑↑↑↑  
 ↑↑↑↑

Nostoc\_cytb6  
 Rhodobacter\_sph  
 Rhodobacter\_cap  
 Saccharomyces  
 Gallus  
 Bos\_taurus

130 140 150 160 170  
 I**V**S**E**G**V**T**G**Y**S**L**P**W**D**Q**V**G**Y**W**A**V**K**I**V**S**G**V**P**E**A**I**P**V**V**G**V**L**I**S**D**L**L**R**G**G**S**  
 M**M**A**T**A**F**M**G**Y**V**L**P**W**G**Q**M**S**F**W**G**A**T**V**I**T**G**L**F**G**A**I**P****G**I**G**H**S**I**Q**T**W**L**L**G**G**P  
 M**M**G**T**A**F**M**G**Y**V**L**P**W**G**Q**M**S**F**W**G**A**T**V**I**T**G**L**F**G**A**I**P****G**I**G**P**S**I**Q**A**W**L**L**G**G**P  
 T**I**A**T**A**F**L**G**Y**C**V**Y**Q**M**S**H**W**G**A**T**V**I**T**N**L**F**S**A**I**P**F**V**G**N**D**I**V**S**W**L**W**G**G**F**  
 L**M**A**T**A**F**V**G**Y**V**L**P**W**G**Q**M**S**F**W**G**A**T**V**I**T**N**L**F**S**A**I**P**Y**I**G**H**T**L**V**E**W**A**W**G**G**F**  
 V**M**A**T**A**F**M**G**Y**V**L**P**W**G**Q**M**S**F**W**G**A**T**V**I**T**N**L**L**S**A**I**P**Y**I**G**T**N**L**V**E**W**I**W**G**G**F**

Nostoc\_cytb6  
 Rhodobacter\_sph  
 Rhodobacter\_cap  
 Saccharomyces  
 Gallus  
 Bos\_taurus

180 190 200 210  
 S**V**Q**A**T**L**T**R**Y**Y**S**A**H**T**F**V**L**P**W**L**I**A**V**F**M**L**F**H**F**L**M**I**R**K**Q**G**I**S**G**P**L  
 A**V**D**N**A**T**L**N**R**F**F**S**L**H**Y**L**L**P**F**V**I**A**A**L**V**A**I**H**I**W**A**F**H**S**T**G**N**N**N**P**T  
 A**V**D**N**A**T**L**N**R**F**F**S**L**H**Y**L**L**P**F**V**I**A**A**L**V**A**I**H**I**W**A**F**H**T**T**G**N**N**N**P**T  
 S**V**S**N**P**T**I**Q**R**F**F**A**L**H**Y**L**V**P**F**I**A**A**M**V**I**M**H**L**M**A**L**H**I**H**G**S**S**N**P**L**  
 S**V**D**N**P**T**L**T**R**F**F**A**L**H**F**L**L**P**F**A**I**A**G**I**T**I**I**H**L**T**F**L**H**E**S**G**S**N**N**P**L  
 S**V**D**K**A**T**L**T**R**F**F**A**E**H**F**I**L**P**F**I**I**M**A**I**A**M**V**H**L**L**F**L**H**E**T**G**S**N**N**P**T

↑↑↑↑  
 ↑↑↑↑  
 ↑↑↑↑  
 ↑↑↑↑

# Figure S13

1. Nostoc\_subIV  
 Rhodobacter\_sph  
 Rhodobacter\_cap  
 Saccharomyces  
 Gallus  
 Bos\_taurus

10 20 30 40

MA THKKK**PD**LDSDP**T**LRAKLA KG MGHNY**Y**GE**P**AW**P**NDLL... YV**F**P**I**V  
 WAFHST**G**NNNP**T**GV**E**VRRTSKAEAK**K**D**T**VP**F**W**P**Y**F**II**K**D**V**FAL**A**LV  
 WAFHT**T**GNNNP**T**GV**E**VRRTSKADA**E**K**D**IL**P**FW**P**Y**F**VI**K**DL**F**AL**A**LV  
 MALHIH**G**SSNP**L**GI**T**.....GNL**D**IP**M**HS**Y**FI**F**K**D**L**V**TF**V**LF  
 IFL**H**ES**G**SSNP**L**GIS.....SDS**D**KIP**F**HP**Y**S**F**K**D**I**L**GL**T**LM  
 LFL**H**ET**G**SSNP**T**GIS.....SDV**D**KIP**F**PH**Y**TI**K**D**I**L**G**AL**L**

Nostoc\_subIV  
 Rhodobacter\_sph  
 Rhodobacter\_cap  
 Saccharomyces  
 Gallus  
 Bos\_taurus

50 60 70 80

IM**G**S**F**AC**I**V**A**LA**V**LD**P**AM**T****G**...EP**N**PE**A**TP**L**E**I**LP**E**W**Y**L**Y**P**V**  
 LL**V**...FF**A**IV**G**MP**N**Y**L**GH**P**DN**Y**IE**A**N**P**LS**TP**A**H**IV**P**E**W**Y**L**P**F**  
 LL**G**...FF**A**V**A**Y**M**P**N**Y**L**GH**P**DN**Y**V**Q**A**N**PL**S**TP**A**H**I**VP**E**W**Y**L**P**F  
 ML**I**...L**A**L**V**F**Y**SP**N**T**L**GH**P**DN**Y**IP**G**N**P**L**V**TP**A**S**I**VP**E**W**Y**L**P**F  
 L**T**P...F**L**T**L**A**L**F**S**P**N**L**L**GH**P**DN**Y**IP**G**N**P**L**V**TP**A**S**I**VP**E**W**Y**L**P**F  
 IL**A**...L**M**LL**V**L**E**F**A**P**D**LL**L**GH**P**DN**Y**TP**A**N**P**L**N**TP**P**H**I**K**P**E**W**Y**L**F**A**

Nostoc\_subIV  
 Rhodobacter\_sph  
 Rhodobacter\_cap  
 Saccharomyces  
 Gallus  
 Bos\_taurus

90 100 110

F**O**IL**R**SL.....PN**K**LL**G**V**L**AM**A**S**V**P**L**GL**I**L**V**P  
 Y**A**IL**R**AF**T**AD**V**V**V**Q**I**AN**F**IS**F**GI**D**AK**F**F**G**V**L**AM**F**GA**I**LV**M**AL**V**P  
 Y**A**IL**R**AF**A**AD**V**V**V**IL**V**D**G**L**T**F**G**IV**D**A**K**F**F**G**V**I**A**M**F**GA**I**AV**M**AL**A**P  
 Y**A**IL**R**SI.....PD**K**LL**G**V**I**TM**F**AA**I**LV**L**L**V**L**P**  
 Y**A**IL**R**SI.....PN**K**LG**V**L**A**L**A**AS**V**L**I**L**F**L**I**P  
 Y**A**IL**R**SI.....PN**K**LG**V**L**A**L**A**F**S**I**L**L**I**L**A**L**I**P

Nostoc\_subIV  
 Rhodobacter\_sph  
 Rhodobacter\_cap  
 Saccharomyces  
 Gallus  
 Bos\_taurus

120 130 140 150

F**I**EN**V**N**K**F**O**NP**R**P**V**AT**T**V**F**L**F**.**G**T**L**V**T**L**W**L**G**I**G**AA**L**P**L**DK**S**L  
 W**L**D**T**SP**V**RS**G**R**Y**RP**M**F**K**I**Y**F**W**LL**A**AD**F**V**I**L**T**W**V**G**A**Q**T**T**F**P**Y**D...  
 W**L**D**T**SK**V**RS**G**A**Y**R**P**K**F**RM**W**F**F**L**V**L**D**F**V**L**T**W**V**G**A**M**P**T**E**Y**P**Y**D**...  
 F**T**DR**S**V**V**RC**N**T**F**K**V**LS**K**FF**F**I**F**V**F**N**F**V**L**L**G**Q**I**G**A**CH**V**E**V**P**Y**V...  
 F**L**H**K**S**K**Q**R**TM**T**FR**R**PL**S**Q**L**L**F**W**L**L**V**AN**L**L**I**L**T**W**I**G**S**Q**P**VE**H**P**F**I...  
 LL**L**HT**S**K**Q**RS**M**MR**P**LS**Q**CL**F**W**A**L**V**AD**L**L**L**T**W**I**G**Q**P**VE**H**P**Y**I...

Nostoc\_subIV  
 Rhodobacter\_sph  
 Rhodobacter\_cap  
 Saccharomyces  
 Gallus  
 Bos\_taurus

160

T**L**GL**F**  
 W**I**SL**I**  
 W**I**SL**I**  
 LM**G**Q**I**  
 I**I**GM  
 T**I**GL
